# Supplementary material for: A Transcriptomics Approach Reveals Putative Interaction of Candidatus Liberibacter Solanacearum with the Endoplasmic Reticulum of Its Psyllid Vector
Source: MDPI journal article supplement (doi:10.3390/insects10090279), 2019-09-02
Supplement: s1 [file s1]

Supplementary Figure S1:

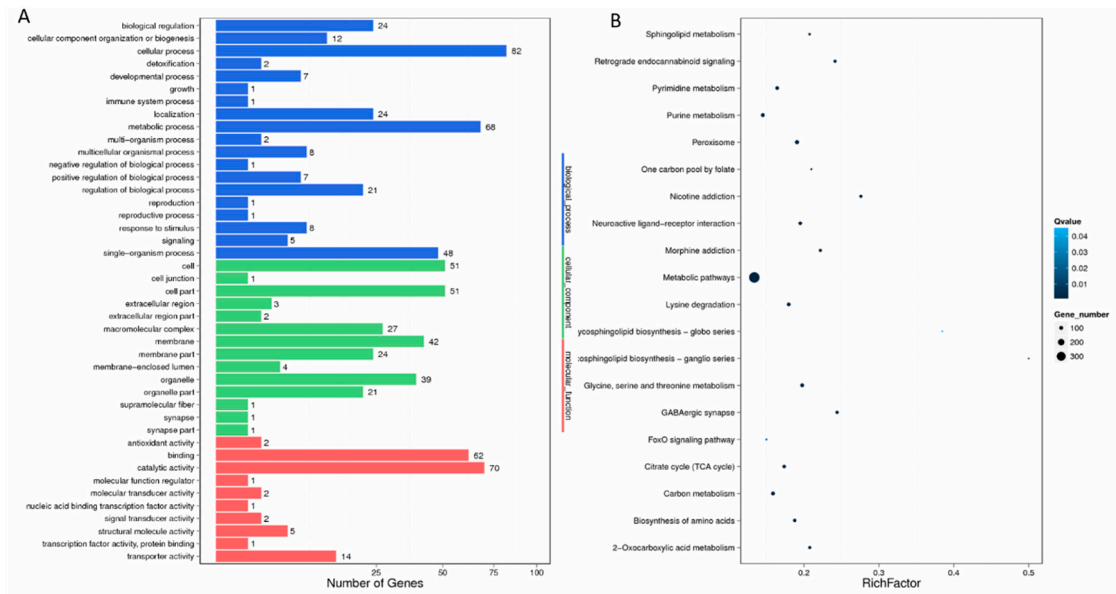

**Figure S1. (A).** GO functional classification of DEGs between CLso infected and uninfected midguts of *B. trigonica*. **(B).** Pathway enrichment statistics of DEGs between CLso infected and uninfected midguts of *B. trigonica*. Accession numbers: The transcriptome de novo assembly generated in this study is available at the DDBJ/EMBL/GenBank database under the BioProject ID: PRJNA561752. Accession number of the raw reads are SRR10019128 and the transcriptome assembly is GHUW0100000000.
